# Supplementary material
Source: PubMed Central journal article supplement (PMC3328719)
Supplement: mmc1.pdf [file mmc1.pdf]

## SUPPORTING MATERIAL

### Structural Role of RKS Motifs in Chromatin Interactions: An MD Study of HP1 Bound to a Variably Modified Histone Tail

George V. Papamokos,<sup>†‡||</sup> George Tziatzos,<sup>§</sup> Dimitrios G. Papageorgiou,<sup>§</sup>  
Spyros D. Georgatos,<sup>¶||</sup> Anastasia S. Politou,<sup>†||\*</sup> and Efthimios Kaxiras<sup>‡||\*\* \*</sup>

<sup>†</sup> Laboratory of Biological Chemistry, Medical School, University of Ioannina, Ioannina 45110, Greece

<sup>‡</sup> Institute of Materials, Ecole Polytechnique Federale de Lausanne (EPFL), CH-1015 Lausanne, Switzerland

<sup>§</sup> Department of Materials Science and Engineering, University of Ioannina, Ioannina 45110, Greece

<sup>¶</sup> Laboratory of Biology, Medical School, University of Ioannina, Ioannina 45110, Greece

<sup>||</sup> Foundation for Research and Technology Hellas-Biomedical Research Institute (BRI/FORTH), 45110 Ioannina, Greece

<sup>\*\*</sup> Department of Physics and School of Engineering and Applied Sciences, Harvard University, Cambridge, Massachusetts 02138, USA

#### \*Corresponding authors

##### *Efthimios Kaxiras*

Department of Physics, Harvard University

17 Oxford Street

Cambridge, MA 02138 USA

Phone: +1 617 495 7977 Email address: kaxiras@physics.harvard.edu

##### *Anastasia Politou*

Laboratory of Biological Chemistry

Medical School, University of Ioannina

Ioannina 45110 GREECE

Phone: +30 26510 07714 Email address: apolitou@cc.uoi.gr

**Table S1:** Partial atomic charges for the modified lysine residues used in the simulations.

| Atom | Methylated Lysine | Dimethylated Lysine | Trimethylated Lysine |
|------|-------------------|---------------------|----------------------|
| N    | -0.34790          | -0.34790            | -0.34790             |
| H    | 0.27470           | 0.27470             | 0.27470              |
| CA   | -0.08182          | -0.23140            | -0.15146             |
| HA   | 0.16951           | 0.18924             | 0.17620              |
| CB   | -0.56172          | -0.10388            | -0.41312             |
| HB2  | 0.12855           | 0.04319             | 0.11975              |
| HB3  | 0.12855           | 0.04319             | 0.11975              |
| CG   | 0.38449           | 0.11841             | 0.24321              |
| HG2  | -0.07328          | -0.04165            | -0.05375             |
| HG3  | -0.07328          | -0.04165            | -0.05375             |
| CD   | 0.03657           | 0.12150             | 0.11497              |
| HD2  | 0.06264           | 0.03292             | 0.03854              |
| HD3  | 0.06264           | 0.03292             | 0.03854              |
| CE   | -0.41503          | -0.35400            | -0.37340             |
| HE2  | 0.22364           | 0.20352             | 0.20138              |
| HE3  | 0.22364           | 0.20352             | 0.20138              |
| NZ   | -0.24031          | -0.05523            | 0.06942              |
| HZ1  | 0.33648           | 0.32676             |                      |
| HZ2  | 0.33648           |                     |                      |
| C1   | -0.21298          | -0.37787            | -0.34631             |
| HC11 | 0.16458           | 0.19949             | 0.18775              |
| HC12 | 0.16458           | 0.19949             | 0.18775              |
| HC13 | 0.16458           | 0.19949             | 0.18775              |
| C2   |                   | -0.37787            | -0.34631             |
| HC21 |                   | 0.19949             | 0.18775              |
| HC22 |                   | 0.19949             | 0.18775              |
| HC23 |                   | 0.19949             | 0.18775              |
| C3   |                   |                     | -0.34631             |
| HC31 |                   |                     | 0.18775              |
| HC32 |                   |                     | 0.18775              |
| HC33 |                   |                     | 0.18775              |
| C    | 0.73410           | 0.73410             | 0.73410              |
| O    | -0.58940          | -0.58940            | -0.58940             |

**Table S2:** Details of the molecular dynamics runs.

---

|                                       |                   |
|---------------------------------------|-------------------|
| Particle Mesh Ewald grid              | 128 x 128 x 128   |
| Electrostatics calculation            | every 4 timesteps |
| Non-bonded interactions calculation   | every 2 timesteps |
| Langevin thermostat damping parameter | 5/ps              |
| Langevin piston oscillation period    | 100 fs            |
| Langevin piston damping parameter     | 50 fs             |

---

**Table S3:** Atoms and dihedral angles selected for clustering of the structures shown in Fig. 2A-B.

| Atoms and dihedrals used for<br>clustering | Dihedrals (°) |         |
|--------------------------------------------|---------------|---------|
|                                            | 66%           | 20%     |
| 8CD-8CG-8CB-8CA                            | -154.77       | -153.70 |
| 8C-8CA-8CB-8CG                             | 67.83         | 159.96  |
| 9N-8C-8CA-8CB                              | -108.10       | -108.18 |
| 9CA-9N-8C-8CA                              | 176.55        | -173.85 |
| 9C-9CA-9N-8C                               | -96.51        | -80.40  |
| 10N-9C-9CA-8N                              | 156.65        | -27.18  |
| 10CA-10N-9C-9CA                            | 153.92        | 176.85  |
| 10CB-10CA-10N-9C                           | 164.88        | 158.74  |

**Table S4:** Average distance ( $\text{\AA}$ ) between the Nitrogen atom  $\zeta$  of K9 (labeled as  $N\zeta$ ) and the centroid of each aromatic ring. The star denotes a modified residue.

|         | H3  | HP1 | K9 <sub>me</sub> |       |                                    | K9 <sub>me2</sub> |       | K9 <sub>me3</sub> |                                    |      |
|---------|-----|-----|------------------|-------|------------------------------------|-------------------|-------|-------------------|------------------------------------|------|
|         |     |     | RK*S             | RK*S* | GK*S*                              | RK*S              | RK*S* | RK*S              | RK*S*                              | GK*S |
| residue | K9* | Y24 | 4.80             | 4.94  | 4.95                               | 4.57              | 4.65  | 4.55              | 4.60<br>(82%)<br><br>6.80<br>(18%) | 4.85 |
|         | K9* | W45 | 4.65             | 4.73  | 4.73<br>(75%)<br><br>6.40<br>(25%) | 4.58              | 4.67  | 4.60              | 4.76                               | 4.74 |
|         | K9* | Y48 | 5.03             | 5.00  | 4.96                               | 4.75              | 4.62  | 4.62              | 4.55                               | 4.52 |

## Supplementary Figures and Figure Captions

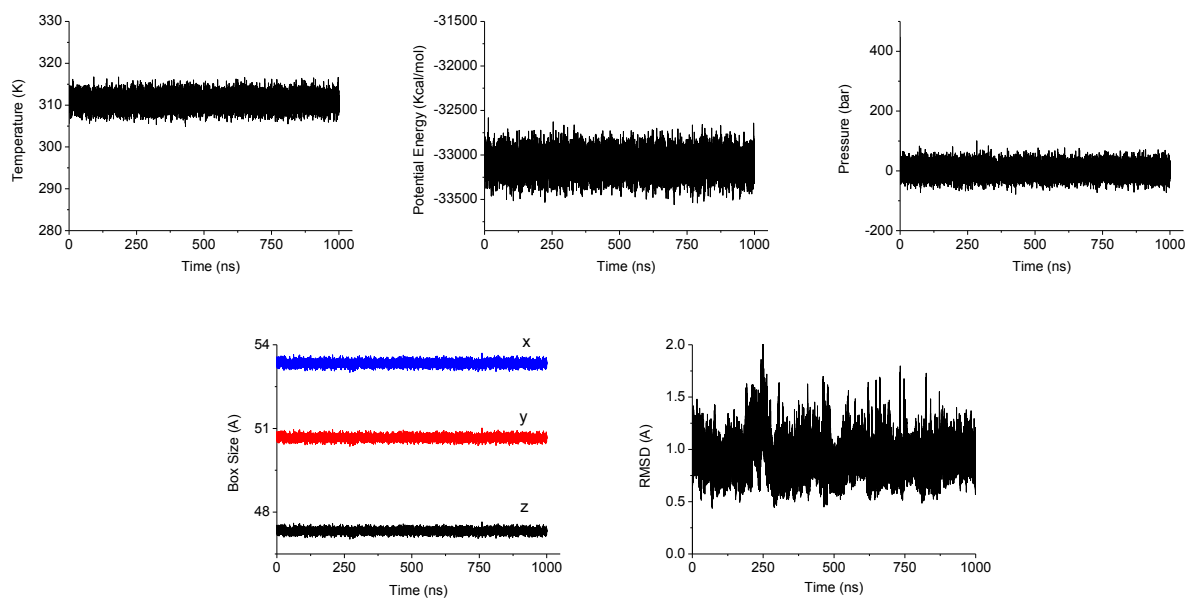

**Figure S1:** Representative plots of Temperature, Potential energy, Pressure, Size of the simulation box and root-mean-square-deviation (RMSD) of the H3-RKmeS peptide atoms from their initial position during the 1  $\mu$ s trajectories. Simulations of all other H3 peptides exhibit similar behavior.

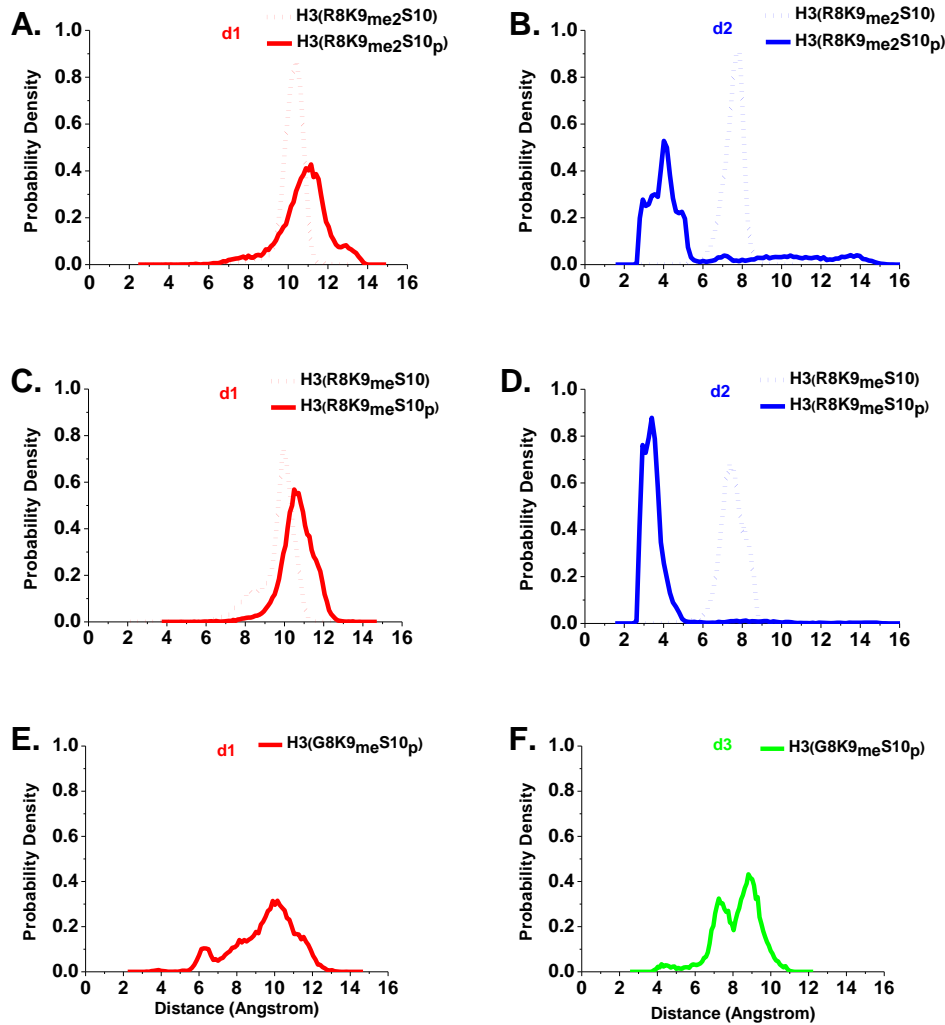

**Figure S2:** Probability Density Functions (PDF) of distance variables  $d_1$ ,  $d_2$  and  $d_3$  (defined in the text and shown in Fig. 1, A and C) for the various forms of the H3 tail. **A.** PDF of  $d_1$  in the phosphorylated (solid line) and unphosphorylated (dashed line) form of K9-dimethylated H3 tail. **B.** PDF of  $d_2$  in the phosphorylated (solid line) and unphosphorylated (dashed line) form of K9-dimethylated H3 tail. **C.** PDF of  $d_1$  in the phosphorylated (solid line) and unphosphorylated (dashed line) form of the K9-monomethylated H3 tail. **D.** PDF of  $d_2$  in the phosphorylated (solid line) and unphosphorylated (dashed line) form of the K9-monomethylated H3 tail. **E.** PDF of  $d_1$  for the K9-monomethylated and S10-phosphorylated H3 tail, in which R8 has been replaced by G. **F.** PDF of  $d_3$  for the K9-monomethylated and S10-phosphorylated H3 tail, in which R8 has been replaced by G.

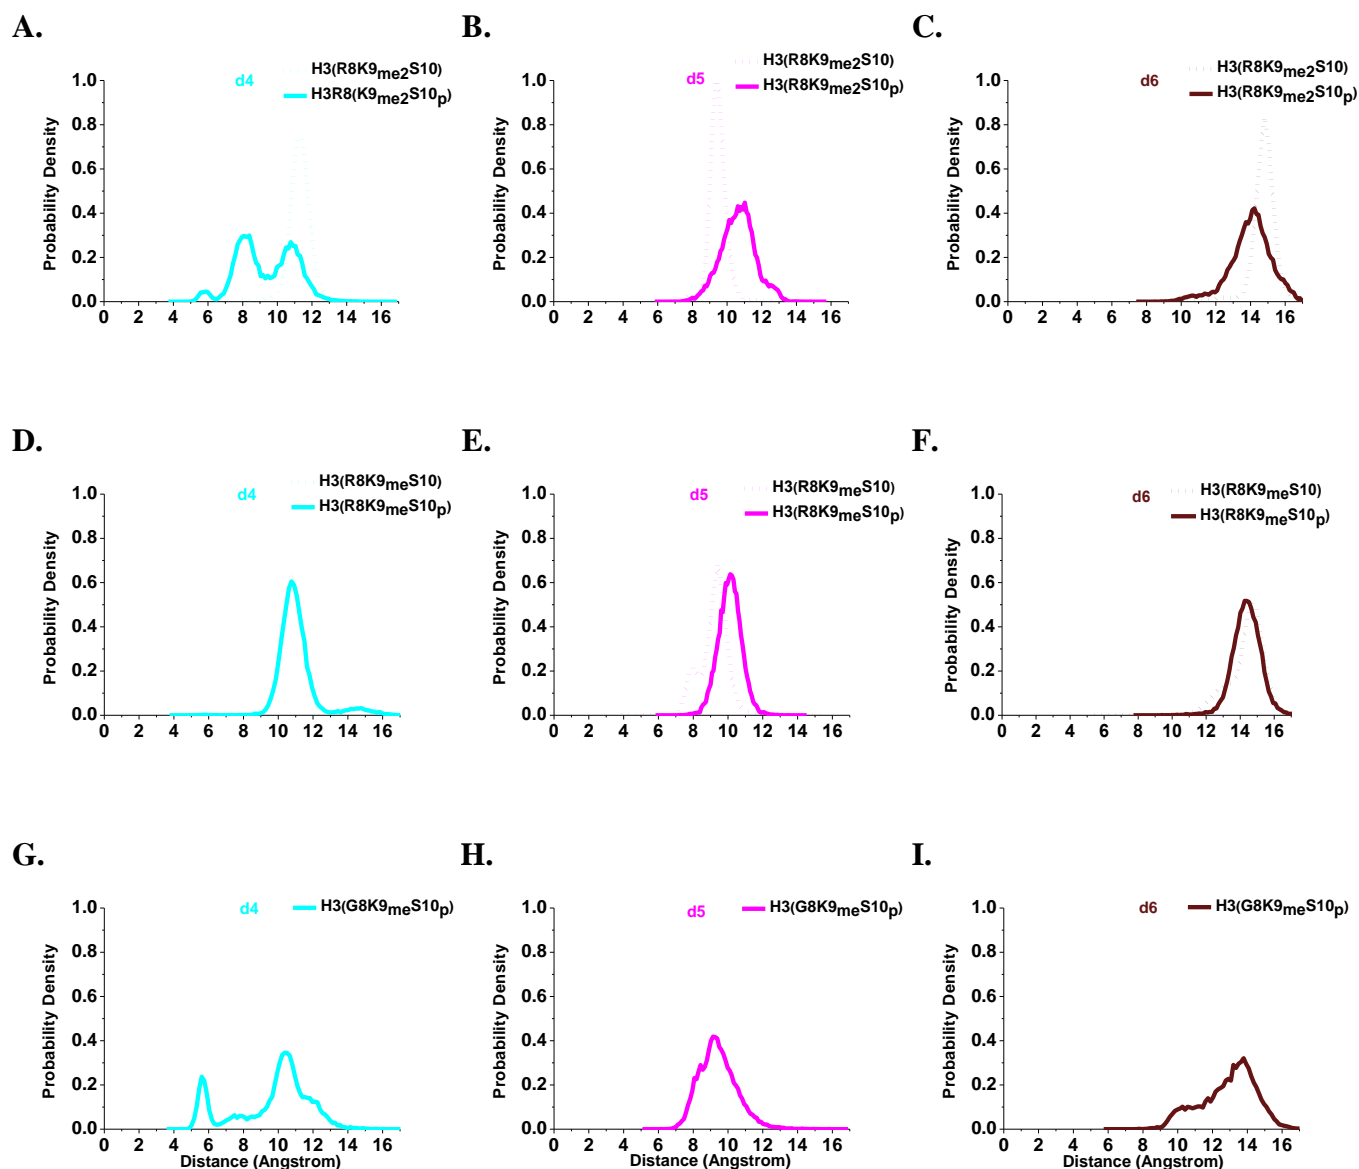

**Figure S3:** Probability Density Functions (PDFs) of the distance variables  $d_4$ ,  $d_5$  and  $d_6$  (defined in the text and shown in Fig. 3, A and C) for the various forms of the H3 tail. **A-C.** PDFs of  $d_4$  (**A**),  $d_5$  (**B**) and  $d_6$  (**C**) in the phosphorylated (solid line) and unphosphorylated (dashed line) form of the K9-dimethylated H3 tail. **D-F.** PDFs of  $d_4$  (**D**),  $d_5$  (**E**) and  $d_6$  (**F**) in the phosphorylated (solid line) and unphosphorylated (dashed line) form of the K9-mono-methylated H3 tail. **G-I.** PDFs of  $d_4$  (**G**),  $d_5$  (**H**) and  $d_6$  (**I**) in the phosphorylated form of the K9-mono-methylated “mutant” H3 peptide (R8 replaced by G).



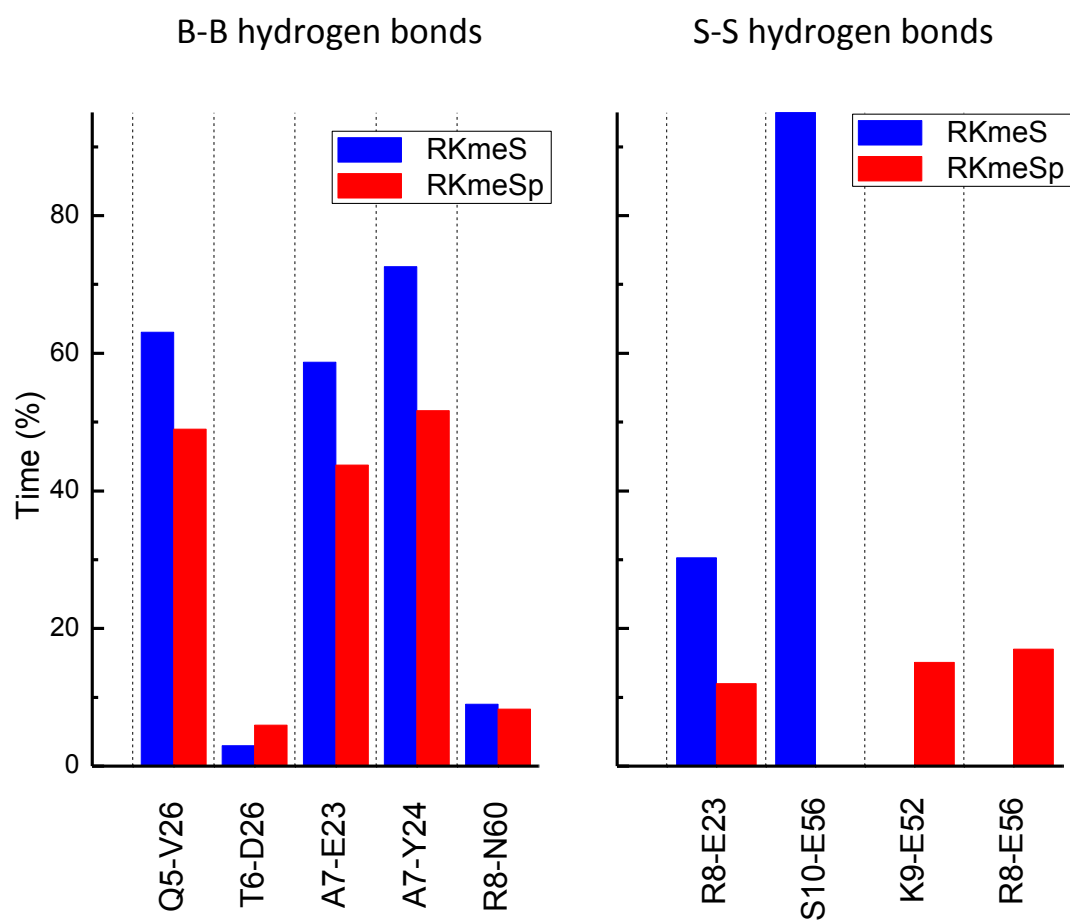

**Figure S4:** Hydrogen bonding between the H3 oligopeptide dimethylated at K9 and HP1. Vertical bars represent percentage of time during which hydrogen bonds persist for the various amino acid pairs in the RKme2S (*blue*) and RKme2Sp (*red*) structures for the backbone atoms (B-B) (*left*) and the side chain atoms (S-S) (*right*).
